# Supplementary material for: Bromination of endo-7-norbornene derivatives revisited: failure of a computational NMR method in elucidating the configuration of an organic structure
Source: publisher site journal article supplement (doi:10.3762/bjoc.19.56), 2023-06-02
Supplement: Additional file 1 [file 1860-5397-19-56-S1.pdf]

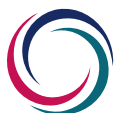

## Supporting Information

for

### **Bromination of *endo*-7-norbornene derivatives revisited: failure of a computational NMR method in elucidating the configuration of an organic structure**

Demet Demirci Gültekin, Arif Daştan, Yavuz Taşkesenligil, Cavit Kazaz, Yunus Zorlu and Metin Balci

*Beilstein J. Org. Chem.* **2023**, *19*, 764–770. [doi:10.3762/bjoc.19.56](https://doi.org/10.3762/bjoc.19.56)

### **Double resonance spectra and X-ray crystal structure**

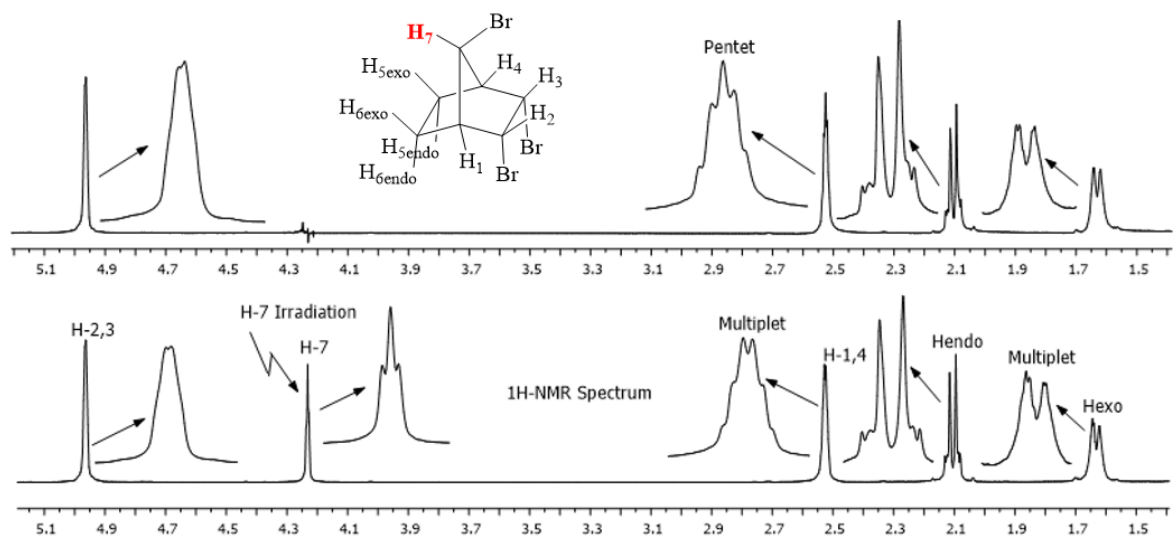

**Figure 1.** Double resonance experiment. Irradiation at the resonance frequency of proton H<sub>7</sub> (4.23 ppm).

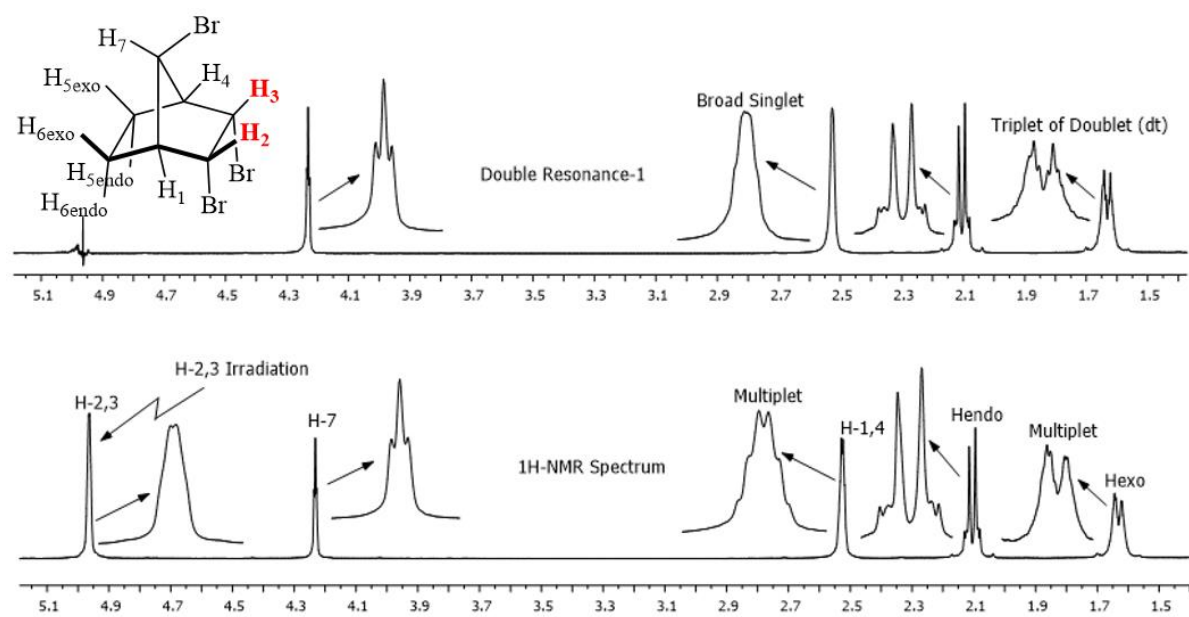

**Figure 2.** Double resonance experiment. Irradiation at the resonance frequency of protons H<sub>2</sub> and H<sub>3</sub> (4.97 ppm).

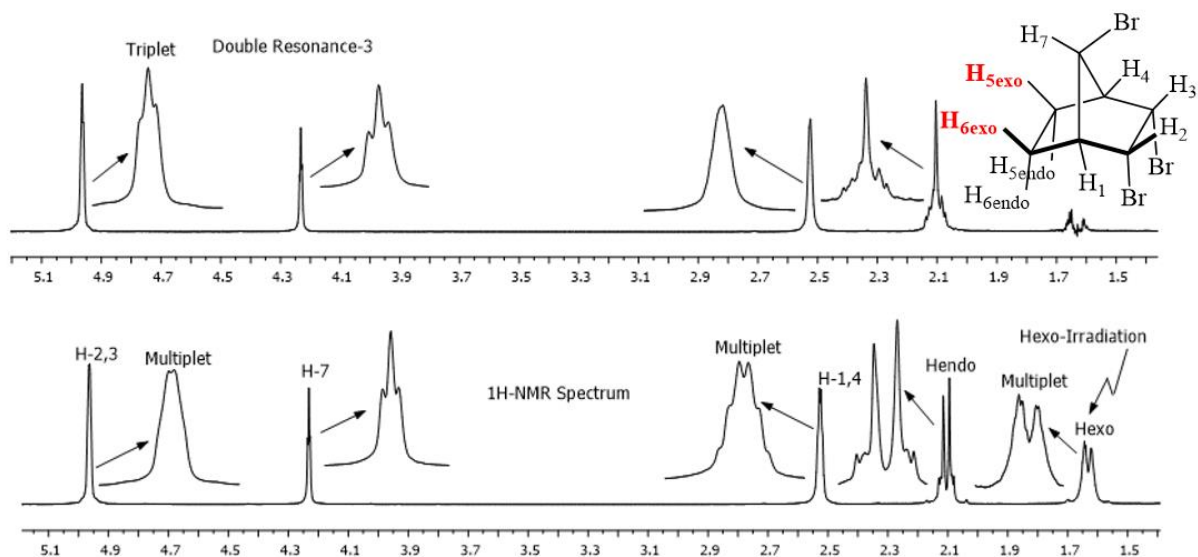

**Figure 3.** Double resonance experiment. Irradiation at the resonance frequency of protons  $H_{5\text{exo}}$  and  $H_{6\text{exo}}$  (1.66 ppm).

**X-ray crystallography:** Single crystal X-ray diffraction data of **6** were performed on a Bruker APEX II QUAZAR three-circle diffractometer using using monochromatized Mo- $K_{\alpha}$  X-radiation ( $\lambda = 0.71073 \text{ \AA}$ ). Indexing, data collection, data reduction<sup>1</sup> and absorption correction<sup>2</sup> were carried out using APEX2.<sup>3</sup> Crystal structure was solved using SHELXT<sup>4</sup> and then refined by full-matrix least-squares refinements on  $F^2$  using the SHELXL<sup>4</sup> in Olex2 Software Package.<sup>5</sup> The aliphatic C-bound H atoms were positioned geometrically and refined using a riding mode. Crystal structure validations, geometrical calculations and drawings were performed using Platon<sup>6</sup> and Mercury software.<sup>7</sup> Bond distances, angles and torsion angles of compound **6** were indicated in **Table S2–S5**. Perspective views of compounds showing the atom-numbering scheme and crystal packing were shown in **Figure S1**. Crystal data and structure refinement details for crystal structure were given in **Table S1**. Additional crystallographic data with CCDC reference number 2201943 has been deposited within the Cambridge Crystallographic Data Center via [www.ccdc.cam.ac.uk/deposit](http://www.ccdc.cam.ac.uk/deposit).

**Table S1.** Crystal data and structure refinement details for compound **6**.

|                                                   |                                                               |
|---------------------------------------------------|---------------------------------------------------------------|
| <b>CCDC</b>                                       | 2201943                                                       |
| <b>Empirical formula</b>                          | C <sub>7</sub> H <sub>9</sub> Br <sub>3</sub>                 |
| <b>Formula weight</b>                             | 332.87                                                        |
| <b>Temperature/K</b>                              | 298                                                           |
| <b>Crystal system</b>                             | Monoclinic                                                    |
| <b>Space group</b>                                | P2 <sub>1</sub> /c                                            |
| <b>a/Å</b>                                        | 6.307(2)                                                      |
| <b>b/Å</b>                                        | 13.8207(10)                                                   |
| <b>c/Å</b>                                        | 10.4280(10)                                                   |
| <b>α/°</b>                                        | 90                                                            |
| <b>β/°</b>                                        | 99.58(2)                                                      |
| <b>γ/°</b>                                        | 90                                                            |
| <b>Volume/Å<sup>3</sup></b>                       | 896.3(3)                                                      |
| <b>Z</b>                                          | 4                                                             |
| <b>ρ<sub>calc</sub>/cm<sup>3</sup></b>            | 2.467                                                         |
| <b>μ/mm<sup>-1</sup></b>                          | 13.426                                                        |
| <b>F(000)</b>                                     | 624.0                                                         |
| <b>Crystal size/mm<sup>3</sup></b>                | 0.235 × 0.147 × 0.106                                         |
| <b>Radiation</b>                                  | MoKα (λ = 0.71073)                                            |
| <b>2θ range for data collection/°</b>             | 5.896 to 50.054                                               |
| <b>Index ranges</b>                               | -7 ≤ h ≤ 7, -16 ≤ k ≤ 16, -12 ≤ l ≤ 11                        |
| <b>Reflections collected</b>                      | 6663                                                          |
| <b>Independent reflections</b>                    | 1550 [R <sub>int</sub> = 0.1010, R <sub>sigma</sub> = 0.0753] |
| <b>Data/restraints/parameters</b>                 | 1550/0/91                                                     |
| <b>Goodness-of-fit on F<sup>2</sup></b>           | 1.038                                                         |
| <b>Final R indexes [I ≥ 2σ (I)]</b>               | R <sub>1</sub> = 0.0595, wR <sub>2</sub> = 0.1646             |
| <b>Final R indexes [all data]</b>                 | R <sub>1</sub> = 0.0890, wR <sub>2</sub> = 0.1942             |
| <b>Largest diff. peak/hole / e Å<sup>-3</sup></b> | 1.11/-1.39                                                    |

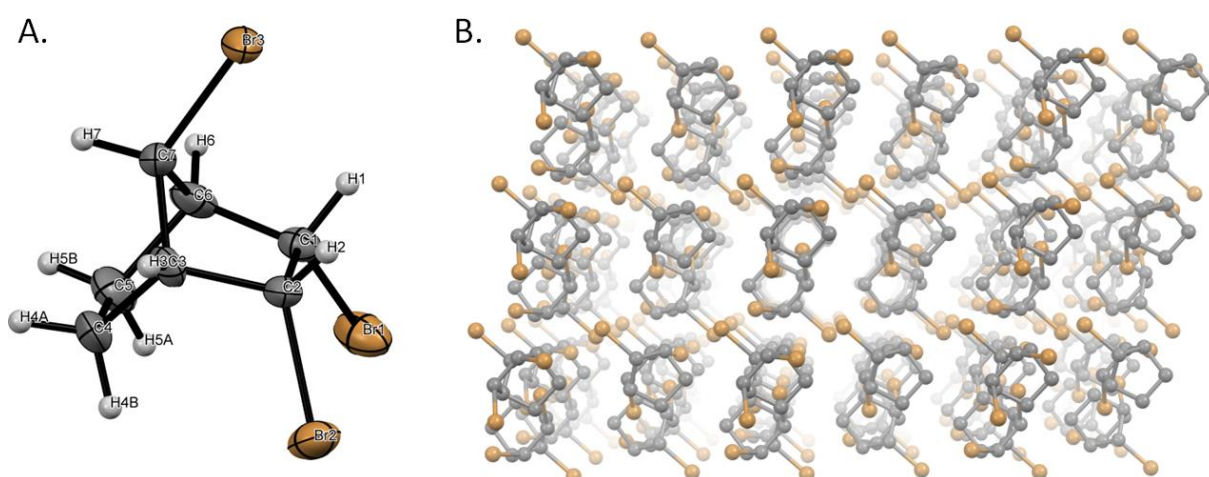**Figure S1.** A) Molecular structure of the compound **6** with displacement ellipsoids drawn at the 30% probability level. H-atoms are shown as small spheres of arbitrary radii. B) Perspective view of the crystal packing of compound **6**

**Table S2.** Bond lengths for compound **6**.

| Atom | Atom | Length/Å  | Atom | Atom | Length/Å  |
|------|------|-----------|------|------|-----------|
| Br1  | C1   | 1.934(8)  | C3   | C4   | 1.532(13) |
| Br2  | C2   | 1.919(8)  | C3   | C7   | 1.509(12) |
| Br3  | C7   | 1.957(9)  | C4   | C5   | 1.546(17) |
| C1   | C2   | 1.535(13) | C5   | C6   | 1.539(12) |
| C1   | C6   | 1.491(14) | C6   | C7   | 1.527(15) |
| C2   | C3   | 1.505(13) |      |      |           |

**Table S3.** Bond angles for compound **6**.

| Atom | Atom | Atom | Angle/°  | Atom | Atom | Atom | Angle/°  |
|------|------|------|----------|------|------|------|----------|
| C2   | C1   | Br1  | 117.9(6) | C3   | C4   | C5   | 104.4(8) |
| C6   | C1   | Br1  | 114.3(6) | C6   | C5   | C4   | 101.5(8) |
| C6   | C1   | C2   | 104.5(7) | C1   | C6   | C5   | 110.4(8) |
| C1   | C2   | Br2  | 116.5(6) | C1   | C6   | C7   | 99.6(8)  |
| C3   | C2   | Br2  | 112.5(6) | C7   | C6   | C5   | 101.8(9) |
| C3   | C2   | C1   | 102.6(7) | C3   | C7   | Br3  | 115.5(7) |
| C2   | C3   | C4   | 111.5(8) | C3   | C7   | C6   | 94.9(7)  |
| C2   | C3   | C7   | 100.8(7) | C6   | C7   | Br3  | 116.2(6) |
| C7   | C3   | C4   | 99.6(9)  |      |      |      |          |

**Table S4.** Torsion angles for compound **6**.

| A   | B  | C  | D   | Angle/°   | A  | B  | C  | D   | Angle/°   |
|-----|----|----|-----|-----------|----|----|----|-----|-----------|
| Br1 | C1 | C2 | Br2 | -5.9(9)   | C2 | C3 | C7 | Br3 | -65.4(9)  |
| Br1 | C1 | C2 | C3  | -129.2(7) | C2 | C3 | C7 | C6  | 56.8(8)   |
| Br1 | C1 | C6 | C5  | 59.9(10)  | C3 | C4 | C5 | C6  | -3.2(12)  |
| Br1 | C1 | C6 | C7  | 166.5(5)  | C4 | C3 | C7 | Br3 | -179.6(7) |
| Br2 | C2 | C3 | C4  | -56.2(10) | C4 | C3 | C7 | C6  | -57.5(8)  |
| Br2 | C2 | C3 | C7  | -161.0(7) | C4 | C5 | C6 | C1  | 72.2(11)  |
| C1  | C2 | C3 | C4  | 69.8(9)   | C4 | C5 | C6 | C7  | -32.8(11) |
| C1  | C2 | C3 | C7  | -35.1(8)  | C5 | C6 | C7 | Br3 | 178.1(7)  |
| C1  | C6 | C7 | Br3 | 64.7(8)   | C5 | C6 | C7 | C3  | 56.5(9)   |
| C1  | C6 | C7 | C3  | -56.9(8)  | C6 | C1 | C2 | Br2 | 122.3(7)  |
| C2  | C1 | C6 | C5  | -70.4(10) | C6 | C1 | C2 | C3  | -1.0(8)   |
| C2  | C1 | C6 | C7  | 36.1(8)   | C7 | C3 | C4 | C5  | 38.4(10)  |
| C2  | C3 | C4 | C5  | -67.2(11) |    |    |    |     |           |

## References

1. SAINT, version 8.34A, Bruker (2013), Bruker AXS Inc., Madison, WI
2. SADABS, version 2014/5, Bruker (2014), Bruker AXS Inc., Madison, WI
3. APEX2, version 2014.11-0, Bruker (2014), Bruker AXS Inc., Madison, WI
4. Sheldrick, G. M. Crystal Structure Refinement with SHELXL. *Acta Crystallogr. Sect. C Struct. Chem.* **2015**, *71*, 3-8.
5. Dolomanov, O. L.; Bourhis, J.; Gildea, R. J.; Howard, J. A. K.; Puschmann, H. *J. Appl. Cryst.* **2009**, *42*, 339-341.
6. Spek, A. L. Structure Validation in Chemical Crystallography. *Acta Crystallogr. Sect. D Biol. Crystallogr.* **2009**, *65*, 148-155.
7. Macrae, C. F.; Sovago, I.; Cottrell, S. J.; Galek, P. T. A.; McCabe, P.; Pidcock, E.; Platings, M.; Shields, G. P.; Stevens, J. S.; Towler, M.; Wood, P. A. *J. Appl. Cryst.* **2020**, *53*.
